# Supplementary material for: The HD(CP)2 Observational Prototype Experiment HOPE – An Overview
Source: Copernicus journal article supplement (doi:10.5194/acp-2016-990), 2016-11-21
Supplement: Supplementary file 1 [file acp-2016-990-supplement.pdf]

HOPE-Jülich Instrument Status

|              |    |    |    |       |    |    |    |    |        |    |    |    |    |    |    |    |    |    |    |     |         |      |  |  |        |     |
|--------------|----|----|----|-------|----|----|----|----|--------|----|----|----|----|----|----|----|----|----|----|-----|---------|------|--|--|--------|-----|
| 20.5.        | OK | OK | OK | 4/4   | OK | OK | OK |    |        | OK | 6/7 | 98/98 ? | OK   |  |  | ?      | 4/4 |
| 21.5.        | OK | OK | OK | 4/4   | OK | OK | OK |    |        | OK | 6/7 | 98/98 ? | OK   |  |  | ?      | 4/4 |
| 22.5.        | OK | OK | OK | 4/4   | OK | OK | OK |    |        | OK | 6/7 | 98/98 ? | OK   |  |  | ?      | 4/4 |
| 23.5.        | OK | OK | OK | 4/4   | OK | OK | OK |    |        | OK | 6/7 | 98/98 ? | OK   |  |  | ?      | 4/4 |
| 24.5. IOP 15 | OK | OK | OK | 4/4   | OK | OK | OK | OK | OK     | OK | OK | OK | OK | OK | OK | OK | OK | OK | OK | 6/7 | 98/98 ? | OK   |  |  | OK     | 4/4 |
| 25.5. IOP 16 | OK | OK | OK | 4/4   | OK | OK | OK | OK | OK     | OK | OK | OK | OK | OK | OK | OK | OK | OK | OK | 6/7 | 98/98 ? | OK   |  |  | OK     | 4/4 |
| 26.5.        | OK | OK | OK | OK    | OK | OK | OK | OK | OK     | OK | OK | OK | OK | OK | OK | OK | OK | OK | OK | 6/7 | OK      | OK   |  |  | OK     | 4/4 |
| 27.5. IOP 17 | OK | OK | OK | OK    | OK | OK | OK | OK | OK: 4W | OK | 6/7 | OK      | OK   |  |  | OK     | 4/4 |
| 28.5. IOP 18 | OK | OK | OK | 5.5/6 | OK | OK | OK | OK | OK: 4W | OK | 6/7 | OK      | (OK) |  |  | partly | 4/4 |
| 29.5.        | OK | OK | OK | 5.5/6 | OK | OK | OK | OK | OK: 4W | OK | 6/7 | OK      | (OK) |  |  |        | 4/4 |
| 30.5.        | OK | OK | OK | 5.5/6 | OK | OK | OK | OK | OK: 4W | OK | 6/7 | OK      | OK   |  |  |        | 4/4 |
| 31.5.        | OK | OK | OK | 5.5/6 | OK | OK | OK | OK | OK: 4W | OK | 6/7 | OK      | OK   |  |  |        | 4/4 |
